# Supplementary material
Source: Research Square preprint supplement (doi:10.21203/rs.3.rs-9621298/v1)
Supplement: Supplementary file 1 [file ba04b65b82a33a6fc5c67829.docx]

**Additional File 1**

**Patient Semi-Structured Qualitative Interview Guie**

First, I’d like to briefly tell you about how we are incorporating COVID-19 testing and treatment options at your clinic. [data collector to describe the program briefly emphasizing the availability of testing and antiviral treatment options for COVID-19]

**1. What prior experience, if any, do you have with getting tested and/or receiving treatment for COVID-19?**

**2. In what ways do you think that having new treatments available for COVID-19 can be helpful for you and/or your family?**

**3. How important is it to you that COVID-19 testing and treatments are offered at your clinic?**

*Probe, why is that?*

**4. Given your experience with your COVID-19 infection care, what, if anything, could be improved at your clinic?**

*Probes: if they need examples: testing availability, clinic wait times, increased education around risk/benefits of treatment with antivirals, etc.*

- What is working well at your clinic?
- What is not working well?

**5. What additional support would help you with future care and treatment for COVID-19?**

*Probes: What would this look like for you?*

**6. Do you think you would have any difficulty coming to the clinic for future COVID-19 care?**

*Probes, if no: why? If yes, what would you need to help you?*

You’ve mentioned some really important considerations during this interview. For instance, you’ve mentioned [summarize a few points back that stood out]. Now that we are almost done with our interview, what do you think is the most important thing we should take-away from talking with you?
